# A Chromosome-Level Genome Assembly for the Rock Ptarmigan (*Lagopus muta*)

**Authors and affiliations:** Patrik Rödin-Mörch, Theodore E. Squires, Giulio Formenti, Alan Tracey, Linelle Abueg, Nadolina Brajuka, Erich Jarvis, Páll Melsted, Jacob Höglund, and Kristinn P. Magnússon

1. University of Akureyri, Akureyri, Iceland
2. Uppsala University, Uppsala, Sweden
3. The Rockefeller University, New York, United States of America
4. Wellcome Sanger Institute, Hinxton, United Kingdom
5. deCODE genetics, Reykjavík, Iceland
6. Icelandic Institute of Natural History, Garðabær, Iceland

**Corresponding author:** Kristinn P. Magnússon, PhD., Department of Business and Science, University of Akureyri, Akureyri, Iceland, +354-590-0578, [kpm@unak.is](mailto:kpm@unak.is)

## **Abstract:**

The Rock Ptarmigan (*Lagopus muta*) is a cold-adapted, largely sedentary, game bird with a Holarctic distribution. The species represents an important example of an organism likely to be affected by ongoing climatic shifts across a disparate range. We provide here a high-quality reference genome and mitogenome for the Rock Ptarmigan assembled from PacBio HiFi and Hi-C sequencing of a female bird from Iceland. The total size of the genome is 1.03 Gb with a scaffold N50 of 71.23 Mb and a contig N50 of 17.91 Mb. The final scaffolds represent all 40 predicted chromosomes, and the mitochondria with a BUSCO score of 98.6%. Gene annotation resulted in 16,078 protein-coding genes out of a total 19,831 predicted (81.08% excluding pseudogenes). The genome included 21.07% repeat sequences, and the average length of genes, exons, and introns were, 33605, 394, and 4265 bp respectively. The availability of a new reference-quality genome will contribute to understanding the Rock Ptarmigan's unique evolutionary history, vulnerability to climate change, and demographic trajectories around the globe. As a wild relative of domesticated Galliformes, findings of avicultural importance may also be revealed.

**Key words:** Reference Genome, *Lagopus muta*, Rock Ptarmigan, Hi-C

## **Introduction:**

The Rock Ptarmigan (*Lagopus muta*, Montin 1776) is a grouse species with a wide distribution across the arctic and subarctic northern hemisphere. It has seasonally variable plumage ranging from almost entirely white in the winter to heavily mottled grey, rust, and brown in the breeding months (see fig. 1). Birds of the genus *Lagopus* are notable for having feathered legs and feet which likely serve to insulate them in cold habitats. The Rock Ptarmigan can be considered as a ring species with variable genetic diversity across its circumpolar range (Sahlman et. al., 2009, Kozma et. al., 2019; see fig. 2). Accordingly, Rock Ptarmigan are expected to be at long-term risk across much of their range due to

ongoing climatic changes and limited suitable habitat (Costanzi and Steifetten, 2019; Masanobu et al., 2019).

With the expected declines in cold specialist species as global temperatures rise (Chamberlain et al., 2012; Scheffers et al. 2016; Scridel et al., 2019; Hoglund et al., 2021), resident birds such as the individual we used to generate the reference genome are particularly valuable to science as they are likely to display many special adaptations necessary for life in the arctic or at high altitude. Some populations of Rock Ptarmigan are considered near-threatened or endangered due to long-term population loss and habitat declines (Nakamura, 2014; Icelandic Institute of Natural History, 2018). The risks associated with declining genetic quality and environmental changes are not well understood, but might be better assessed with a locally sourced reference genome. For populations with robust historical demographics such as the Icelandic population (Gardarsson, 1988; Nielsen et al., 1986-2011), a locally sourced reference genome is exponentially more valuable in assessing demographic history.

The species nearest relatives include other members of Tetraonidae (order Galliformes). The mitochondrial genome of Rock Ptarmigan was previously made available along with the mitochondrial DNA of a sister species Willow Grouse (*Lagopus lagopus*; Sveinsdóttir and Magnússon, 2017). The Willow Grouse and Rock Ptarmigan are believed to have diverged as recently as 1 million years ago (Kozma et al., 2019) and often studied together as sister species. The white-tailed ptarmigan (*Lagopus leucura*) is the most closely related species with whole genome data available, having a common ancestor with other *Lagopus* taxa no older than 3 million years ago, although the genome assembly is not currently annotated (Kozma et al., 2019; Clark et al., 2016; GenBank: GCA\_019238085.1).

Here, we describe the first reference-quality genome assembly and annotations for Rock Ptarmigan. A combination of long-read and conformation capture sequencing technologies was used to assemble the 1.03 Gb haploid genome.

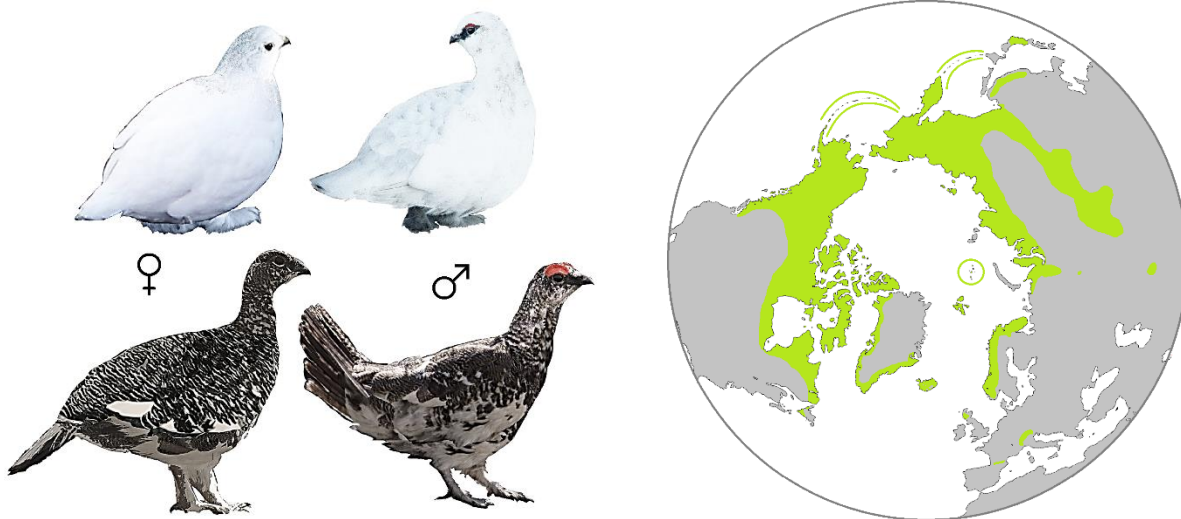

**Figure 1**

Diagram of the sexually dimorphic seasonal molt patterns of adult Rock Ptarmigan showing white winter plumage and mottled breeding colors.

**Figure 2**

A range map showing the global distribution of Rock Ptarmigan above 30° north.

## **Materials and methods:**

### **Sample collection and PCR preparation:**

High molecular weight DNA extraction was performed in laboratories at Uppsala University using special procedures associated with the DNeasy Blood & Tissue kits (Qiagen, Germany). As basis for the reference genome assembly and annotation, blood from a single female bird collected (shot) in Húsavík, northern Iceland, in 2018 was used (NCBI BioSample SAMN25144835) while additional blood, heart, muscle, brain, kidney, liver, ovaries, and spleen from a second bird was collected for RNA-seq to aid in gene prediction (NCBI BioSample SAMN26436951, SAMN29421920, SAMN29421921, SAMN29421922, SAMN29421923, SAMN29421924, SAMN29421925, and SAMN29421926 respectively). Materials from the birds used remain accessioned with the Icelandic Institute of Natural History in Garðabær, Iceland.

### **Sequencing:**

Sequencing was achieved using two PacBio SMRT smart cells run on a Sequel II system, while Dovetail Genomics Hi-C Kits were processed on an Illumina NovaSeq 6000.

### **Genome assembly:**

The genome was assembled following the Vertebrate Genome Project (VGP; Rhie, 2021) assembly pipeline. First, a kmer database was generated using Meryl (v.1.3) from the PacBio HiFi reads for reference-free genome evaluation and downstream assembly QC. The kmer size was set to 21 after running the best\_k.sh script for the expected genome size (~1Gb) in Merqury (v.1.3; Rhie et al., 2020). PacBio HiFi reads were assembled using hifiasm (v. 0.15.1-r334; Cheng et al., 2021), followed by a round of purge\_dups (v. 1.2.5; Guan et al., 2020) incorporating minimap2 (v.2.17-r941). Each of the previous steps was followed by assembly evaluation which included contig/scaffold statistics calculated via Assembly\_stats (v. 0.1.4; 10.5281/zenodo.3968775), BUSCO (v. 5.3.1), and kmer spectrum plots using Merqury (v.1.3; Rhie et al., 2020). The assembly was scaffolded using the Hi-C reads. Briefly, reads were first aligned to the assembly using the VGP modified version of the Arima mapping pipeline that uses bwa mem (v.0.7.17-r1188) and samtools (v. 1.19) for alignment and Picard (v.2.10.3) for 5'-end filtering and duplication removal. Scaffolding was performed using Salsa2 (v.2.3) and evaluated using BUSCO and scaffold statistics.

The Hi-C reads were then mapped back to the scaffolded assembly using the same pipeline as in the previous step and the resulting bam file was converted to pretext format using PretextView (v. 0.1.7). The resulting Hi-C contact maps were visualized and edited in PretextView (v. 0.2.5). The assembly then was curated by the Wellcome Sanger Institute.

The mitochondrial genome was assembled separately from both raw reads and contigs using MitoHifi (v. 2.2; Uliano-Silva et. al., 2021) with automatic alignment to the Japanese Rock Ptarmigan (*L. muta japonica*; Yonezawa and Nishibori, 2020) via built-in features from the MitoFinder dependency (v. 1.4.1; Allio et. al., 2020).

The completed genome assembly is publicly available in NCBI under accession number [GCA\\_023343835.1](https://www.ncbi.nlm.nih.gov/assembly/GCA_023343835.1).

### **Genome annotation:**

The Rock Ptarmigan reference genome was annotated using the standard NCBI Eukaryotic Genome Annotation Pipeline version 10.0. A detailed summary of the pipeline is available online at: [https://www.ncbi.nlm.nih.gov/genome/annotation\\_euk/process/](https://www.ncbi.nlm.nih.gov/genome/annotation_euk/process/). In contrast to previous iterations, this version of the pipeline used RFAM (v.14.6; Kalvari et al., 2021) for discovery of small non-coding RNA's and STAR (Dobin et al. 2013) for alignment of RNA-seq reads from our supplementary tissues. The pipeline has stable use of several tools including BUSCO (v. 4.1.4; Manni et al., 2021) and Splign (Kapustin et al., 2008) among others.

For calculation of genomic masking, the Rock Ptarmigan had its genomic sequence masked by WindowMasker (Morgulis et al., 2006). Annotation of the mitochondrial genome was achieved via manual comparison with the extant published Icelandic Rock Ptarmigan genome in addition to automatic annotation using MITOS WebServer (Bernt et. al., 2013).

## **Results:**

### **Sequencing and Assembly Results:**

The final assembly sequence is 1,026,771,810 base pairs long, with 71,937 gap bases (0.007%). The genome assembly includes 375 contigs arranged on 165 scaffolds. The scaffold N50 is 71,229,700 bp with an L50 of 5. The Contig N50 is 17,905,263 bp with an L50 of 19.

Average coverage across the genome is 57.75x. In total 38 autosomes were identified, with 18 unlocalized sequences among them. Additional W and Z allosomes were described with only a single unlocalized sequence found on the W. Assembly summary statistics appear significantly better than the current *Gallus gallus* reference genome (GRCg6a), and are modest in comparison to the most recently annotated *Gallus gallus* individual (bGalGal1.mat.broiler.GRCg7b; See Table 1 below).

Statistical analysis to determine completeness and quasi-variance showed expected values (See Table 2 below)

|                          | <i>Lagopus muta</i><br>Reference Genome<br>(bLagMut1) | <i>Gallus gallus</i><br>Most Recent Annotation<br>(bGalGal1.mat.broiler.GRCg7b) | <i>Gallus gallus</i><br>Reference Genome<br>(GRCg6a) |
|--------------------------|-------------------------------------------------------|---------------------------------------------------------------------------------|------------------------------------------------------|
| Total length             | 1,026,771,810                                         | 1,053,332,251                                                                   | 1,065,348,650                                        |
| Total ungapped length    | 1,026,699,873                                         | 1,049,948,333                                                                   | 1,055,564,190                                        |
| Gaps between scaffolds   | 0                                                     | 0                                                                               | 68                                                   |
| Number of scaffolds      | 165                                                   | 214                                                                             | 524                                                  |
| Scaffold N50             | 71,229,700                                            | 90,861,225                                                                      | 20,785,086                                           |
| Scaffold L50             | 5                                                     | 4                                                                               | 12                                                   |
| Number of contigs        | 375                                                   | 677                                                                             | 1,402                                                |
| Contig N50               | 17,905,263                                            | 18,834,961                                                                      | 17,655,422                                           |
| Contig L50               | 19                                                    | 18                                                                              | 19                                                   |
| Chromosomes and plasmids | 41                                                    | 42                                                                              | 34                                                   |
| Component sequences      | 165                                                   | 677                                                                             | 2,243                                                |

**Table 1**

A series of “global” statistics published in the public release of the Rock Ptarmigan reference genome on NCBI indicating the completeness of the new reference genome in comparison to the gold standard Chicken reference genome and the most recently annotated Chicken reference genome.

|              | Completeness |           |         | Quasi-variance |          |         |          |
|--------------|--------------|-----------|---------|----------------|----------|---------|----------|
| bLagMut1.pri | 934494250    | 992616058 | 94.1446 | 10953          | 1.03E+09 | 62.9412 | 5.08E-07 |
| bLagMut1.alt | 856101045    | 992616058 | 86.2469 | 7185           | 9.23E+08 | 64.3112 | 3.71E-07 |
| both         | 989631110    | 992616058 | 99.6993 | 18138          | 1.95E+09 | 63.5365 | 4.43E-07 |

**Table 2**

A series of statistics showing completeness and quasi-variance scores for the bLagMut1 assembly.

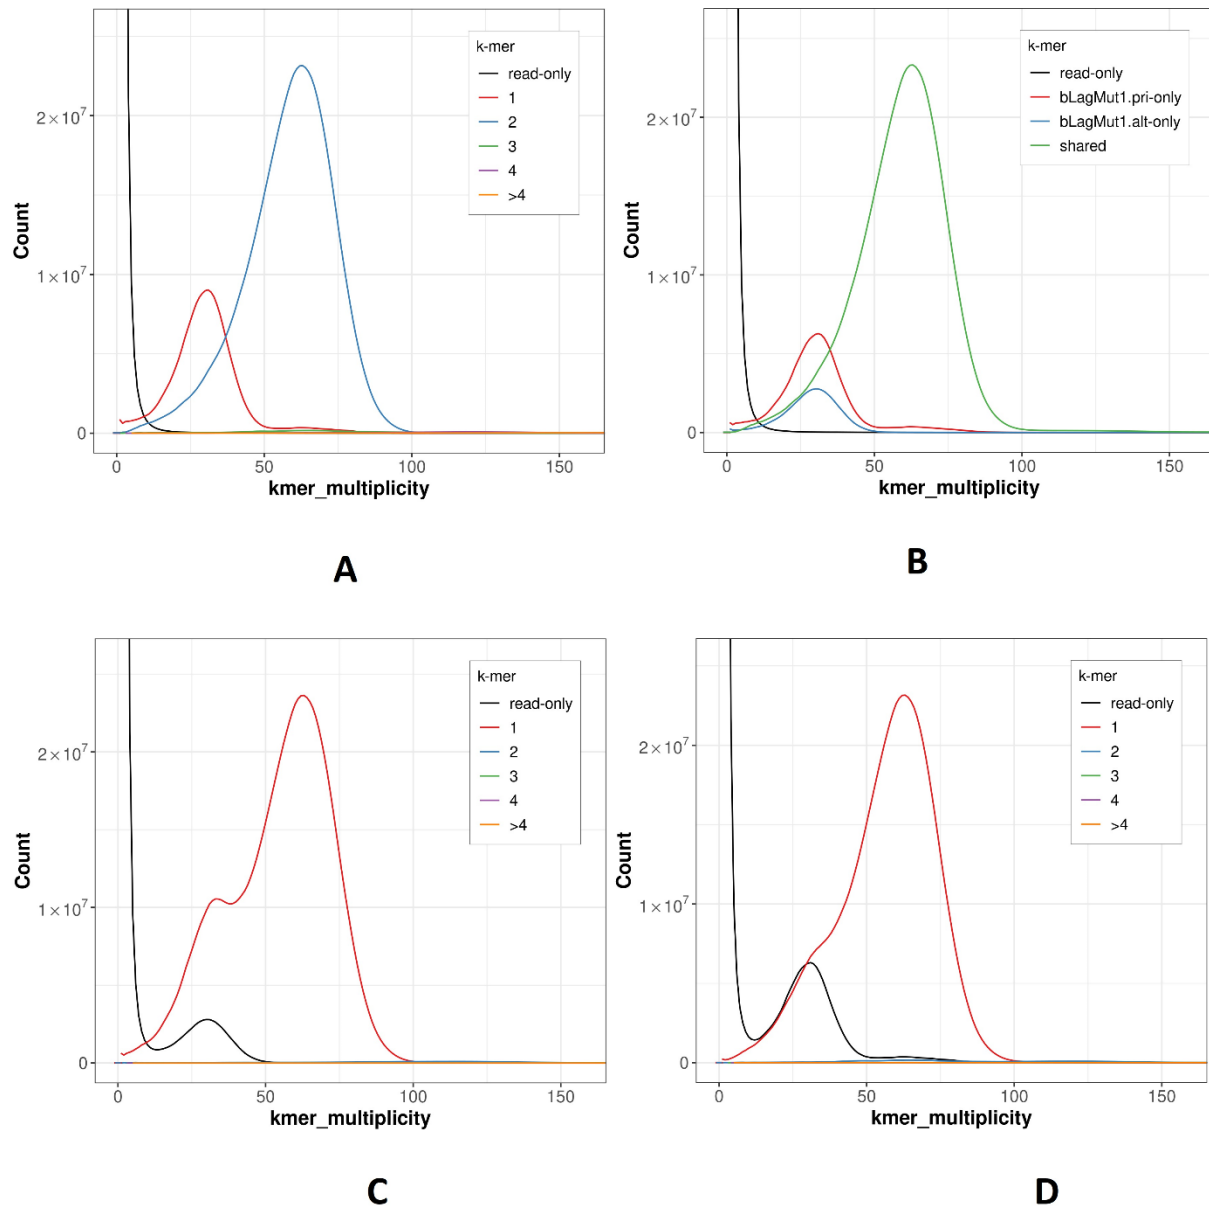

**Figure 3**

Outputs from Merqury showing kmer distribution according to: (A.) Spectra-cn plot of the bLagMut1 complete assembly, (B.) spectra-asm plot of the bLagMut1 complete assembly, (C.) spectra-cn plot of the bLagMut1 primary assembly, and (D.) spectra-cn plot of the bLagMut1 alternate assembly.

### **Genome Annotation:**

In total 20,110 genes and pseudogenes were identified by combining gene prediction and similarity approaches, with approximately 80% identified as protein coding. The annotated genes showed a 98.6% completeness score against 98.9% for the whole genome when set against the BUSCO avian dataset (aves\_odb10 lineage) and indicating 0.9% of genes missing from the annotated assembly. The annotation

and associate summary statistics are available in NCBI's RefSeq genome record for the reference (Pruitt et al., 2013). The contents of the report are summarized in Table 3.

|                       | <i>Lagopus muta</i><br>Reference Genome Annotation<br>(bLagMut1) | <i>Gallus gallus</i><br>Most Recent Annotation<br>(bGalGal1.mat.broiler.GRCg7b) |
|-----------------------|------------------------------------------------------------------|---------------------------------------------------------------------------------|
| Genes and Pseudogenes | 20,110                                                           | 25,635                                                                          |
| Protein Coding Genes  | 16,078                                                           | 18,023                                                                          |
| Non-Coding Genes      | 3,738                                                            | 7,330                                                                           |
| mRNA                  | 43,785                                                           | 68,670                                                                          |
| lncRNA                | 5,431                                                            | 10,062                                                                          |
| tRNA                  | 306                                                              | 303                                                                             |
| CDSs                  | 43,793                                                           | 68,683                                                                          |
| Introns (mean length) | 206,142 (4,265)                                                  | 241,290 (4,145)                                                                 |
| Exons (mean length)   | 229,018 (394)                                                    | 262,919 (490)                                                                   |
| Mean Gene Size        | 33kb                                                             | 28kb                                                                            |
| Maximum Gene Size     | 1.6 Mb                                                           | 1.3 Mb                                                                          |
| BUSCO Score           | 98.6%                                                            | 98.7%                                                                           |

**Table 3**

A comparative table showing the relative accuracy and completeness of the *Lagopus muta* reference annotation (NCBI *Lagopus muta* Annotation Release 100) against the most recently complete annotation of the chicken genome (NCBI *Gallus gallus* Annotation Release 106).

### **Mitochondrial Genome:**

The mitochondrial DNA was described with all 13 expected protein coding sequences. The complete mitochondrial genome was assembled from reads using MitoHifi (Uliano-Silva et. al., 2021) and analyzed for accuracy through comparative analysis. With our addition, there are now four extant mitochondrial genomes published for the Rock Ptarmigan; Two from Iceland, one from Japan, and one from Siberia (Sveinsdóttir and Magnússon, 2017; Yonezawa et. al., 2020; Wang et. al., 2017). Using the ClustalW package embedded in BioEdit (Thompson et. al., 1994; Hall, 1999), we found a total of 24 bases divergent from the previously published Icelandic Rock Ptarmigan mitogenome in a manual review. Of these divergences 14 appeared in coding regions and 8 appeared unique to the previously published individual and our calls at those locations were conserved in the other Rock Ptarmigan populations. None of the polymorphisms observed between the populations appeared to be uniquely conserved in the

Icelandic Population. Analysis of pairwise distances using phylogenetic tree software in Mega11 (Tamura et. al., 2021) showed clear grouping of the Rock Ptarmigan separated from the Willow Ptarmigan, as previously reported (Sveinsdóttir and Magnússon, 2017).

### **Discussion:**

Our new avian reference genome includes a highly complete set of information with 99.994% of the 1.03 Gb described matching to 40 haploid chromosomes and the mitochondrial genome. Other recent works have aimed to unlock the potential provided by Rock Ptarmigan genetics (Kozma, 2019; Sigmarsdóttir, 2022). In comparison to other recently published genomes, it is of clearly high quality.

Though Rock Ptarmigan has been globally identified as Least Concern by the IUCN in recent years, there have been regional fluctuations in its status and some nations identify the species as threatened due to long term declines (IUCN, 2022; European Commission, 2022; Icelandic Institute of Natural History, 2018). It is well established that Arctic species such as Rock Ptarmigan may be disproportionately affected by climate change with an expected poleward contraction of species ranges (Birdlife International, 2015). For more disparate populations such as those in the mountains of Honshu, the European Alps, and the Pyrenees, rising tree lines may entirely squeeze the Rock Ptarmigan out of its montane niches as has been suggested broadly for alpine habitats (Dirnböck et al., 2011; MRI EDW Working Group, 2015), and some closely related species (Jackson et al., 2016). Given the species' unique evolutionary adaptations to life in the arctic and uncertain future, this reference genome should be recognized as one with broad conservation implications.

Many wildlife species are difficult to study at the genomic level due to limited specimen availability and limitations on procurement (Hope et al., 2018; Kemp, 2015). Because the Rock Ptarmigan is a widespread game bird, it is particularly useful for genomic studies. Hunters have the potential to contribute robust data regarding the species trends and may continue to contribute both historical and new specimen materials for research (Cretois et al., 2020). Because of the species close cultural connection to some regions and history as a food source, the Rock Ptarmigan may benefit from additional conservation efforts from an involved public or concerned hunters and may be a good candidate for flagship status (McGowan et al., 2020).

Future studies into Rock Ptarmigan genomics may benefit from a history of captive breeding and the availability of nearly wild birds. Rock Ptarmigan has been utilized as food and traded since prehistory with human dispersal possible as early as the Viking age (McGovern et al., 2006), but in the last four decades of the modern era, birds from Svalbard have been regularly brought to a colony housed in Tromsø for research purposes (Stokkan, 1988). Already, Rock Ptarmigan hatched and raised in captivity have been used for gene expression studies to understand circadian rhythms and investigations of the cecal microbiome (Appenroth et al., 2021; Salgado-Flores et al., 2019). This represents a valuable opportunity for tailored future study.

Among avian diversity, the birds in the family Galliformes represent less than 3% of all species but have an outsized impact on global economics with Chickens, Turkeys, Pheasants, Quails, and Grouse all being regularly consumed. Among the available avian genomes (Bravo et al, 2021) those in order Galliformes are represented with 26 species assemblies currently available on NCBI (approximately 5% of all extant; Sayers et al., 2022). Among these, 68 assemblies have been completed and the domestic chicken has been assembled 30 times. This highlights a commercial implication for Rock Ptarmigans as they have many unique adaptations that could be of importance to the poultry industry.



Much work has been done using the chicken genome for past studies (Bert, 2005; Li et al., 2022) and given the usefulness of wild relatives for research into domesticated species (Li et al., 2020; Jackson et al., 2016) the Rock Ptarmigan may prove to be an exceedingly useful model for understanding other Galliformes. This relationship will surely have limitations in the genomic realm as more distantly related species are less informative at finer scales than those that are closely related (Scutari et al., 2016). However, if the Rock Ptarmigan's genes tailored to arctic landscapes can be used to better understand genetic pathways for cold weather survival or improved forage capabilities, viable improvements may be identified for commercially important species. Because the Rock Ptarmigan is more phylogenetically basal to many modern domesticated Galliformes, it may aid in the identification of gene developments responsible for ancestral traits.

Taking all of this into consideration, the arrival of a Rock Ptarmigan reference genome makes the species exceptionally well positioned for investigation across a broad range of scientific inquiry. With links to arctic/alpine biomes, hunting cultures, and the poultry industry, the Rock Ptarmigan reference genome provides a unique opportunity to capitalize on a species at the intersection of many issues of global significance.

### **Significance statement:**

The Rock Ptarmigan is a widespread bird species of economic and nutritional importance to large portions of the northern hemisphere. Though small parts of the Rock Ptarmigan's genetic profile were previously understood, the massive effort undertaken to sequence and annotate the whole genome provides an ability to understand the species at a molecular level. This vertebrate genome allows for new critical assessment of the Rock Ptarmigan and related species at the individual, population, and the environmental level.

### **Conflicts of Interest:**

We declare no conflicts of interest.

**Preprint Statement:** The authors wish to advise that the current preprint has been compiled, revised, and submitted, almost exclusively by Patrik Rödin-Mörch, Theodore E. Squires, and Giulio Formenti with minimal oversight from the other listed authors. While the other authors will be included in final published versions of this manuscript with reflections of their input on the contents, we can not at this time say that the contents of this paper, particularly in the discussion section, represent the views of all listed authors. Much deserved acknowledgements to the laboratory technicians who assisted with this project will also be added.

### **Funding:**

The study was financed by the Ptarmigan Ecogenomics project funded by a grant from the Icelandic Research Fund (IRF) (Rannis nr. 206529-051) under the purview of Kristinn P. Magnússon. Additional funding was provided by Jacob Höglund with grant VR 2018-04635.

### **Data Availability Statement (required):**

The final annotation has been publicly released and uploaded according to the high standards of the Earth BioGenome Project (Lewin et al., 2018). The genome assembly, including the raw shotgun sequencing data, and the mitochondrial genome has been uploaded to NCBI and is available at [https://www.ncbi.nlm.nih.gov/assembly/GCA\\_023343835.1](https://www.ncbi.nlm.nih.gov/assembly/GCA_023343835.1); BioProject: PRJNA836583; BioSample: SAMN25144835

### **References:**

- Allio, R, Schomaker-Bastos, A, Romiguier, J, Prosdocimi, F, Nabholz, B, Delsuc, F. MitoFinder: Efficient automated large-scale extraction of mitogenomic data in target enrichment phylogenomics. *Mol Ecol Resour.* 2020; 00: 1– 14. <https://doi.org/10.1111/1755-0998.13160>
- Appenroth, D., G. Wagner, D. Hazlerigg, and A. West. 2021. Evidence for circadian based photoperiodic timekeeping in Svalbard ptarmigan, the northernmost resident bird. *Current Biology* 31(12):2720-2727. <https://doi.org/10.1016/j.cub.2021.04.009>
- Bay, R. A., Harrigan, R. J., Underwood, V. L., Gibbs, H. L., Smith, T. B., & Rugg, K. (2018). Genomic signals of selection predict climate-driven population declines in a migratory bird. *Science*, 359(6371), 83–86. doi: 10.1126/science.aan4380
- Bernt, M., Donath A., Jühling F., Externbrink F., Florentz C., Fritzsche G., Pütz J., Middendorf M., and Stadler P. F. 2013. MITOS: improved de novo metazoan mitochondrial genome annotation. *Mol Phylogenet Evol.* 69:313-319.
- Berryman, AA, Ed. 2002. Population cycles: the case for trophic interactions. Oxford University Press
- BirdLife International. 2015. Climate change is driving poleward shifts in the distributions of species. Downloaded from <http://www.birdlife.org>
- Bravo, G.A., C. J. Schmitt, and S. V. Edwards. 2021. What Have We Learned from the First 500 Avian Genomes? *Annual Review of Ecology, Evolution, and Systematics* 52(1): 611-639

Brynjarsdóttir J, Lund SH, Magnusson KG, and Nielsen ÓK. 2003. Analysis of timeseries for rock ptarmigan and gyrfalcon populations in north-east Iceland. RH-18-2003, Raunvísindastofnun Háskólans, Háskóli Íslands

Burt DW. Chicken genome: current status and future opportunities. *Genome Res.* 2005 Dec;15(12):1692-8. doi: 10.1101/gr.4141805. PMID: 16339367.

Chamberlain, D., Arlettaz, R., Caprio, E., Maggini, R., Pedrini, P., Rolando, A., & Zbinden, N. 2012. The altitudinal frontier in avian climate impact research. *Ibis*, 154, 205–209. <https://doi.org/10.1111/j.1474-919X.2011.01196.x>

Cheng, H., Concepcion, G.T., Feng, X., Zhang, H., Li H. (2021) Haplotype-resolved de novo assembly using phased assembly graphs with hifiasm. *Nat Methods*, 18:170-175. <https://doi.org/10.1038/s41592-020-01056-5>

Charlesworth D, Morgan MT, and Charlesworth B.(1993).Mutation accumulation infinite outbreeding and inbreeding populations. *Genet. Res.*61: 39–56.

Chen Y, Chen Y, Shi C, Huang Z, Zhang Y, Li S, Li Y, Ye J, Yu C, Li Z, Zhang X, Wang J, Yang H, Fang L, Chen Q. SOAPnuke: a MapReduce acceleration-supported software for integrated quality control and preprocessing of high-throughput sequencing data. *Gigascience*. 2018 Jan 1;7(1):1-6. doi: 10.1093/gigascience/gix120

Clark, Karen, Ilene Karsch-Mizrachi, David J. Lipman, James Ostell, and Eric W. Sayers. 2016. GenBank. *Nucleic Acids Res.* 2016 Jan 4; 44(Database issue): D67–D72. doi: 10.1093/nar/gkv1276

Costanzi, Jean-Marc, and Øyvind Steifetten. 2019. Island biogeography theory explains the genetic diversity of a fragmented rock ptarmigan (*Lagopus muta*) population. *Ecology and Evolution* 9(7):3837-3849. <https://doi.org/10.1002/ece3.5007>

Cretois, B., J. Linnell, M. Grainger, E. Nilsen, J. Rød. 2020. Hunters as citizen scientists: Contributions to biodiversity monitoring in Europe. *Global Ecology and Conservation* 23:e01077. <https://doi.org/10.1016/j.gecco.2020.e01077>.

Dirnböck, T., F. Essl, and W. Rabitsch. 2011. Disproportional risk for habitat loss of high-altitude endemic species under climate change. *Global Change Biology*, 17: 990-996. <https://doi.org/10.1111/j.1365-2486.2010.02266.x>

Dobin A, Davis CA, Schlesinger F, Drenkow J, Zaleski C, Jha S, Batut P, Chaisson M, Gingeras TR. STAR: ultrafast universal RNA-seq aligner. *Bioinformatics*. 2013 Jan 1;29(1):15-21. doi: 10.1093/bioinformatics/bts635. Epub 2012 Oct 25. PMID: 23104886; PMCID: PMC3530905.

European Commission, Directorate-General for Environment, European red list of birds 2021, European Commission, 2022, <https://data.europa.eu/doi/10.2779/959320>

Formenti, Giulio & Theissinger, Kathrin & Fernandes, Carlos & Bista, Iliana & Bombarely, Aureliano & Bleidorn, Christoph & Ciofi, Claudio & Crottini, Angelica & Godoy, José & Höglund, Jacob & Malukiewicz, Joanna & Alice, Mouton & Oomen, Rebekah & Paez, Sadye & Palsbøll, Per & Pampoulie, Christophe & Ruiz-López, María & Svardal, Hannes & Theofanopoulou, Constantina & Meiri, Shai. (2022). The era of reference genomes in conservation genomics. *Trends in Ecology & Evolution*. 37. 10.1016/j.tree.2021.11.008.

Gardarsson, A.(1988).Cyclic population changes and some related events in rockptarmigan in Iceland. Pages 259-265 inAdaptive strategies and population ecology ofnorthern grouse(A. T. Bergerud, and M. W. Gratson, Eds.). University of MinnesotaPress, Minneapolis

Ghurye, J., Pop, M., Koren, S., Bickhart, D., & Chin, C. S. (2017). Scaffolding of long read assemblies using long range contact information. *BMC genomics*, 18(1), 527.

Guan D, McCarthy SA, Wood J, Howe K, Wang Y, Durbin R. Identifying and removing haplotypic duplication in primary genome assemblies. *Bioinformatics*. 2020 May 1;36(9):2896-2898. doi: 10.1093/bioinformatics/btaa025. PMID: 31971576; PMCID: PMC7203741.

Hak-Min Kim, Sungwon Jeon, Oksung Chung, Je Hoon Jun, Hui-Su Kim, Asta Blazyte, Hwang-Yeol Lee, Youngseok Yu, Yun Sung Cho, Dan M Bolser, Jong Bhak, Comparative analysis of 7 short-read sequencing platforms using the Korean Reference Genome: MGI and Illumina sequencing benchmark for whole-genome sequencing, *GigaScience*, Volume 10, Issue 3, March 2021, giab014, <https://doi.org/10.1093/gigascience/giab014>

Hall, T.A. 1999. BioEdit: A User-Friendly Biological Sequence Alignment Editor and Analysis Program for Windows 95/98/NT. *Nucleic Acids Symposium Series*, 41, 95-98.

Haukioja E, and Hakala T.(1975). Herbivore cycles and periodic outbreaks: formulation of a general hypothesis. *Report Kevo Subarctic Research Station*,12:1-3

Hope, A., B. Sandercock, and J. Malaney. 2018. Collection of Scientific Specimens: Benefits for Biodiversity Sciences and Limited Impacts on Communities of Small Mammals. *BioScience* 68(1): 35–42. <https://doi.org/10.1093/biosci/bix141>

Höglund, J., Laurila, A., & Rödin-Mörch, P. (2021). Population Genomics and Wildlife Adaptation in the Face of Climate Change. In P. A. Hohenlohe & O. P. Rajora (Eds.), *Population Genomics: Wildlife*, 333–355. Springer International Publishing. doi: 10.1007/13836\_2019\_69

Icelandic Institute of Natural History. 2018. IINH Red List for Birds of Iceland. <https://www.ni.is/en/resources/publications/red-lists/fuglar>

IUCN. 2022. The IUCN Red List of Threatened Species. Version 2022-2. <https://www.iucnredlist.org>

Jackson MM, Gergel SE, Martin K. Effects of Climate Change on Habitat Availability and Configuration for an Endemic Coastal Alpine Bird. *PLoS One*. 2015 Nov 3;10(11):e0142110. doi: 10.1371/journal.pone.0142110. Erratum in: *PLoS One*. 2016;11(1):e0146838. PMID: 26529306; PMCID: PMC4631505.

Johnsson, M., E. Gering, P. Willis, S. Lopez, L. Van Dorp, G. Hellenthal, R. Henriksen, U. Friberg & D. Wright. 2016. Feralisation targets different genomic loci to domestication in the chicken. *Nature Communications* 7:12950

Kalvari, I., Eric P Nawrocki, Nancy Ontiveros-Palacios, Joanna Argasinska, Kevin Lamkiewicz, Manja Marz, Sam Griffiths-Jones, Claire Toffano-Nioche, Daniel Gautheret, Zasha Weinberg, Elena Rivas, Sean R Eddy, Robert D Finn, Alex Bateman, Anton I Petrov, Rfam 14: expanded coverage of metagenomic, viral and microRNA families, *Nucleic Acids Research*, Volume 49, Issue D1, 8 January 2021, Pages D192–D200, <https://doi.org/10.1093/nar/gkaa1047>

Kapustin Y, Souvorov A, Tatusova T, Lipman D. Splign: algorithms for computing spliced alignments with identification of paralogs. *Biol Direct*. 2008 May 21;3:20. doi: 10.1186/1745-6150-3-20. PMID: 18495041; PMCID: PMC2440734.

Keith LB.(1963).*Wildlife's ten-year cycles*. University of Wisconsin Press, Madison, Wisconsin

Kemp C. 2015. Museums: The endangered dead. *Nature* 518: 293 <https://doi.org/10.1038/518292a>

Kozma, R., Rödin-Mörch, P. & Höglund, J. Genomic regions of speciation and adaptation among three species of grouse. *Sci Rep* 9, 812 (2019). <https://doi.org/10.1038/s41598-018-36880-5>

León, L., R. de la Rosa, L. Velasco, & A. Belaj. 2018. Using Wild Olives in Breeding Programs: Implications on Oil Quality Composition. *Frontiers in Plant Science* 2018(9) <https://doi.org/10.3389/fpls.2018.00232>

Lewin HA, Robinson GE, Kress WJ, Baker WJ, Coddington J, Crandall KA, et al. 2018. Earth BioGenome Project: Sequencing life for the future of life". *Proceedings of the National Academy of Sciences of the United States of America*. 115 (17): 4325–4333. doi:10.1073/pnas.1720115115

Li, M., C. Sun, N. Xu, P. Bian, X. Tian, X. Wang, Y. Wang, X. Jia, R. Heller, M. Wang, F. Wang, X. Dai, R. Luo, Y. Guo, X. Wang, P. Yang, D. Hu, Z. Liu, W. Fu, S. Zhang, X. Li, C. Wen, F. Lan, A. Siddiki, C. Suwannapoom, X. Zhao, Q. Nie, X. Hu, Y. Jiang, N. Yang. 2022. De Novo Assembly of 20 Chicken Genomes Reveals the Undetectable Phenomenon for Thousands of Core Genes on Microchromosomes and Subtelomeric Regions. *Molecular Biology and Evolution*, 39(4). <https://doi.org/10.1093/molbev/msac066>

Li, X., Yang, J., Shen, M. et al. Whole-genome resequencing of wild and domestic sheep identifies genes associated with morphological and agronomic traits. *Nat Commun* 11, 2815 (2020). <https://doi.org/10.1038/s41467-020-16485-1>

Masanobu, H., I. Tsuyama, K. Nakao, M. Ozeki, M. Higa, Y. Kominami, T. Hamada, T. Matsui, M. Yasuda, and N. Tanaka. 2019. Modeling future wildlife habitat suitability: serious climate change impacts on the potential distribution of the Rock Ptarmigan *Lagopus muta japonica* in Japan's northern Alps. *BMC Ecol* 19:23, <https://doi.org/10.1186/s12898-019-0238-8>

McGovern, T. H., Perdikaris, S., Einarsson, Á., & Sidell, J. 2006. Coastal connections, local fishing, and sustainable egg harvesting: patterns of Viking Age inland wild resource use in Mývatn district, Northern Iceland. *Environmental Archaeology*, 11(2), 187–205. doi:10.1179/174963106x123205

McGowan, J., Beaumont, L.J., Smith, R.J. et al. Conservation prioritization can resolve the flagship species conundrum. *Nat Commun* 11, 994 (2020). <https://doi.org/10.1038/s41467-020-14554-z>

Mosè Manni, Matthew R Berkeley, Mathieu Seppey, Felipe A Simão, Evgeny M Zdobnov, BUSCO Update: Novel and Streamlined Workflows along with Broader and Deeper Phylogenetic Coverage for Scoring of

Eukaryotic, Prokaryotic, and Viral Genomes. *Molecular Biology and Evolution*, Volume 38, Issue 10, October 2021, Pages 4647–4654

Morgulis A, Gertz EM, Schäffer AA, Agarwala R. WindowMasker: window-based masker for sequenced genomes. *Bioinformatics*. 2006 Jan 15;22(2):134-41. doi: 10.1093/bioinformatics/bti774. Epub 2005 Nov 15. PMID: 16287941.

Mountain Research Initiative EDW Working Group. 2015. Elevation-dependent warming in mountain regions of the world. *Nature Clim Change* 5, 424–430. <https://doi.org/10.1038/nclimate2563>

Nakamura, H. 2014. Rock Ptarmigan. Red Data Book 2014: Endangered Wildlife of Japan 2 Birds (Rare Species Conservation Promotion Office, Wildlife Division, Natural Environment Bureau, Ministry of the Environment, Gyosei Co., Ltd., 2014), pp. 100-101 ((In Japanese))

Nielsen, O.K.(1986). Population ecology of the gyrfalcon in Iceland with comparative notes on the merlin and the raven. Ph.D. thesis, Cornell University, Ithaca

Nielsen ÓK and Pétursson G.(1995). Population fluctuations of gyrfalcon and rock ptarmigan: analysis of export figures from Iceland. *Wildlife Biology*, 1: 65-71.

Nielsen O.K.(1999). Gyrfalcon predation on ptarmigan: numerical and functional responses. *Journal of Animal Ecology*, 68: 1034-1050

Nielsen ÓK, Brynjarsdóttir J, and Magnússon KG.(2004). Monitoring of the ptarmigan population in Iceland 1999–2003. *Fjölrit Náttúrufræðistofnunar (in Icelandic with English summary)*, 47:1–110

Nielsen ÓK. (2011). Gyrfalcon population and reproduction in relation to Rock Ptarmigan numbers in Iceland. In R. T. Watson, T. J. Cade, M. Fuller, G. Hunt and E. Potapov (Eds.), *Gyrfalcons and ptarmigans in a changing world* (pp. 21–48). Boise, ID: The Peregrine Fund

Patterson, Jordan & Carpenter, Eric & Zhu, Zhenzhen & An, Dan & Liang, Xinming & Geng, Chunyu & Drmanac, Radoje & Wong, Gane. (2019). Impact of sequencing depth and technology on de novo RNA-Seq assembly. *BMC Genomics*. 20. 10.1186/s12864-019-5965-x.

Pruitt KD, Brown GR, Hiatt SM, Thibaud-Nissen F, Astashyn A, Ermolaeva O, Farrell CM, Hart J, Landrum MJ, McGarvey KM, Murphy MR, O'Leary NA, Pujar S, Rajput B, Rangwala SH, Riddick LD, Shkeda A, Sun H, Tamez P, Tully RE, Wallin C, Webb D, Weber J, Wu W, DiCuccio M, Kitts P, Maglott DR, Murphy TD, Ostell JM. RefSeq: an update on mammalian reference sequences. *Nucleic Acids Res.* 2014 Jan;42(Database issue):D756-63. doi: 10.1093/nar/gkt1114. Epub 2013 Nov 19. PMID: 24259432; PMCID: PMC3965018.

Rhie, A., McCarthy, S.A., Fedrigo, O. et al. Towards complete and error-free genome assemblies of all vertebrate species. *Nature* 592, 737–746 (2021). <https://doi.org/10.1038/s41586-021-03451-0>

Rhie, A., Walenz, B.P., Koren, S. et al. Merqury: reference-free quality, completeness, and phasing assessment for genome assemblies. *Genome Biol* 21, 245 (2020). <https://doi.org/10.1186/s13059-020-02134-9>

Sahlman, T., G. Segelbacher, and J. Höglund. 2009. Islands in the ice: colonisation routes for rock ptarmigan to the Svalbard archipelago. *Ecogeography* 32(5): 840-848. <http://www.jstor.org/stable/20696293>

Salgado-Flores A, Tveit AT, Wright A-D, Pope PB, Sundset MA (2019) Characterization of the cecum microbiome from wild and captive rock ptarmigans indigenous to Arctic Norway. *PLoS ONE* 14(3): e0213503. <https://doi.org/10.1371/journal.pone.0213503>

Sayers EW, Bolton EE, Brister JR, Canese K, Chan J, Comeau DC, Connor R, Funk K, Kelly C, Kim S, Madej T, Marchler-Bauer A, Lanczycki C, Lathrop S, Lu Z, Thibaud-Nissen F, Murphy T, Phan L, Skripchenko Y, Tse T, Wang J, Williams R, Trzwick BW, Pruitt KD, Sherry ST. Database resources of the national center for biotechnology information. *Nucleic Acids Res.* 2022 Jan 7;50(D1):D20-D26. doi: 10.1093/nar/gkab1112. PMID: 34850941; PMCID: PMC8728269.

Sæther BE, Visser ME, Grøtan V, Engen S. Evidence for r- and K-selection in a wildbird population: a reciprocal link between ecology and evolution. (2016). *Proc Biol Sci.* 283(1829):20152411. doi:10.1098/rspb.2015.2411

Scridel, D., Brambilla, M., Martin, K., Lehtikoinen, A., Iemma, A., Matteo, A., Jähnig, S., Caprio, E., Bogliani, G., Pedrini, P., Rolando, A., Arlettaz, R. and Chamberlain, D. (2018), A review and meta-analysis of the effects of climate change on Holarctic mountain and upland bird populations. *Ibis*, 160: 489-515. <https://doi.org/10.1111/ibi.12585>

Scutari M, Mackay I, Balding D (2016) Using Genetic Distance to Infer the Accuracy of Genomic Prediction. *PLOS Genetics* 12(9): e1006288. <https://doi.org/10.1371/journal.pgen.1006288>



- Sigmarsdóttir, E.S. 2022. Bachelor's Thesis on development of a qPCR assay for molecular sexing of three Icelandic bird species. University of Akureyri.
- Smith, T. B., Fuller, T. L., Zhen, Y., Zaunbrecher, V., Thomassen, H. A., Njabo, K., ... Harrigan, R. J. 2021. Genomic vulnerability and socio-economic threats under climate change in an African rainforest bird. *Evolutionary Applications*, 14(5), 1239–1247. doi: <https://doi.org/10.1111/eva.13193>
- Stokkan, Karl-Arne, Peter J. Sharp, Ian C. Dunn, Robert W. Lea. 1988. Endocrine changes in photostimulated willow ptarmigan (*Lagopus lagopus lagopus*) and Svalbard ptarmigan (*Lagopus mutus hyperboreus*). *General and Comparative Endocrinology*, 70(1): 169-177
- Sturludottir E, Nielsen OK, G Stefansson.(2018).Evaluation of ptarmiganmanagement with a population reconstruction model.*The Journal of WildlifeManagement*82(5):958-965
- Sveinsdóttir M, Magnússon KP. Complete mitochondrial genome and phylogenetic analysis of willow ptarmigan (*Lagopus lagopus*) and rock ptarmigan (*Lagopus muta*) (Galliformes: Phasianidae: Tetraoninae). *Mitochondrial DNA B Resour.* 2017 Jul 11;2(2):400-402. doi: 10.1080/23802359.2017.1347834
- Tamura, Koichiro, Glen Stecher, and Sudhir Kumar. 2021. MEGA11: Molecular Evolutionary Genetics Analysis version 11. *Molecular Biology and Evolution* 38:3022-3027
- Thompson, J.D., D. G. Higgins, and T. J. Gibson. 1994. CLUSTAL W: improving the sensitivity of progressive multiple sequence alignment through sequence weighting, position-specific gap penalties and weight matrix choice. *Nucleic Acids Res.* 22(22): 4673–4680. doi: 10.1093/nar/22.22.4673
- Uliano-Silva, Marcela, João Gabriel Ferreira Nunes, Ksenia Krasheninnikova, & Shane A. McCarthy. (2021). marcelauliano/MitoHiFi: mitohifi\_v2.0 (v2.0). Zenodo. <https://doi.org/10.5281/zenodo.5205678>
- Wang N, Hosner PA, Liang B, Braun EL, Kimball RT. Historical relationships of three enigmatic phasianid genera (Aves: Galliformes) inferred using phylogenomic and mitogenomic data. *Mol Phylogenet Evol.* 2017 Apr;109:217-225. doi: 10.1016/j.ympev.2017.01.006. Epub 2017 Jan 11. PMID: 28088402.
- Yonezawa, Takahiro, and Masahide Nishibori. 2020. The complete mitochondrial genome of the Japanese rock ptarmigan (*Lagopus muta japonica* Clark, 1907). *Mitochondrial DNA Part B.* 5(2): 1648-1649. <https://doi.org/10.1080/23802359.2020.1746207>
